# Supplementary material for: Electrical conductivity switching and memory effects in poly(N-vinylcarbazole) derivatives with pendant azobenzene chromophores and terminal electron acceptor moieties
Source: Royal Society of Chemistry journal article supplement (doi:10.1039/c0jm04344c), 2011-01-01
Supplement: c0jm04344c.pdf [file c0jm04344c.pdf]

## Supporting Information- JM-ART-12-2010-004344.R1

### Electrical Conductivity Switching and Memory Effects in Poly(*N*-vinylcarbazole) Derivatives with Pendant Azobenzene Chromophores and Terminal Electron Acceptor Moieties

Gang Liu,<sup>b§</sup> Bin Zhang,<sup>a§</sup> Yu Chen,<sup>a\*</sup> Chun-Xiang Zhu,<sup>c</sup> Longjia Zeng,<sup>a</sup> D. Siu-Hung Chan,<sup>c</sup> Koon-Gee Neoh<sup>b</sup>, Junneng Chen<sup>a</sup>, En-Tang Kang<sup>b\*</sup>

<sup>a</sup>Key Laboratory for Advanced Materials, Institute of Applied Chemistry, East China University of Science and Technology, 130 Meilong Road, Shanghai 200237, People's Republic of China

<sup>b</sup>Department of Chemical & Biomolecular Engineering, National University of Singapore, Kent Ridge, Singapore 119260

<sup>c</sup>Department of Electrical & Computer Engineering, National University of Singapore, Kent Ridge, Singapore 119260

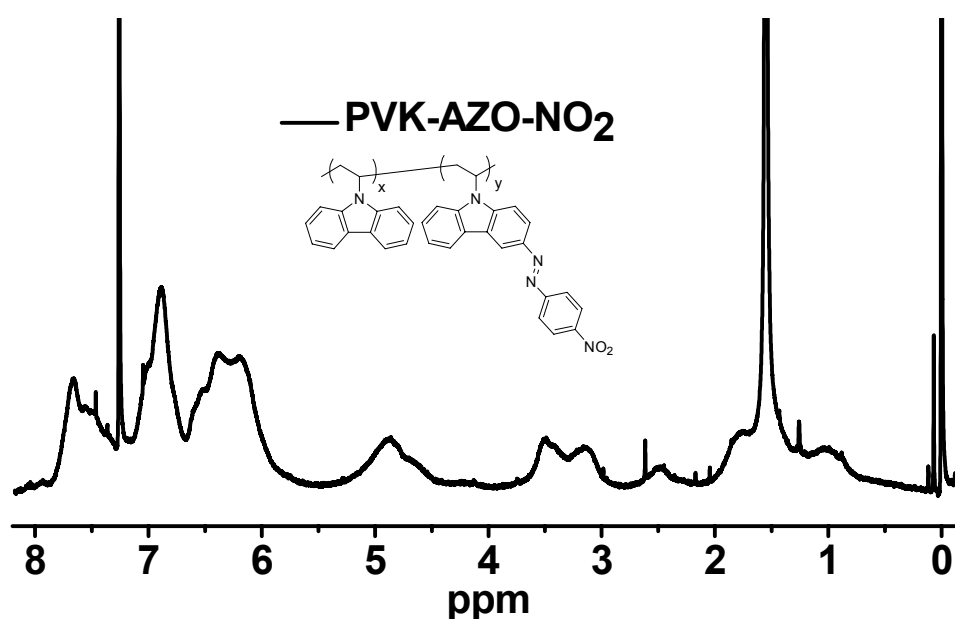

**Figure S1.** <sup>1</sup>H NMR spectrum of PVK-AZO-NO<sub>2</sub> polymer.

§ These authors contribute equally to this work.

\* To whom all correspondence should be addressed.

Email addresses: [chentangyu@yahoo.com](mailto:chentangyu@yahoo.com) (Chen) and [cheket@nus.edu.sg](mailto:cheket@nus.edu.sg) (Kang)

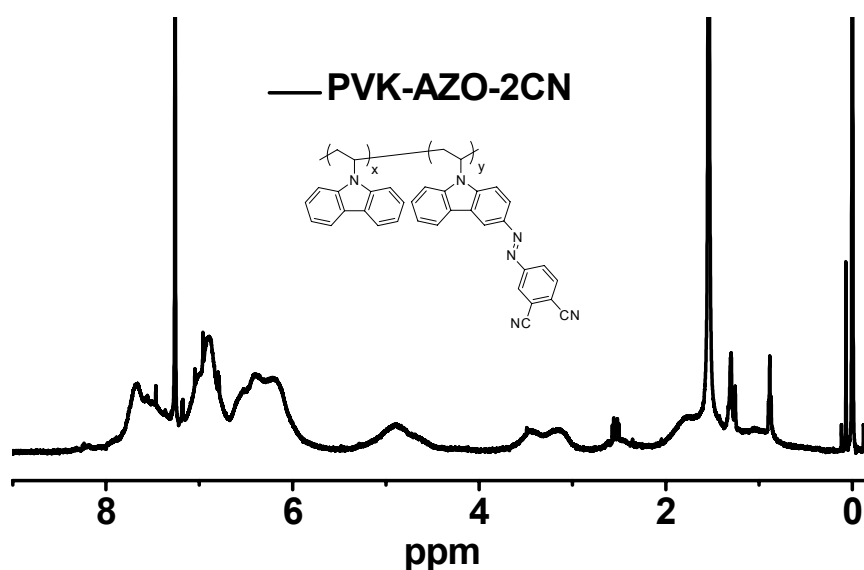

**Figure S2.**  $^1\text{H}$  NMR spectrum of PVK-AZO-2CN polymer.

The  $^1\text{H}$  NMR spectra of both PVK-AZO- $\text{NO}_2$  and PVK-AZO-2CN polymers, which are similar to that of the pure PVK polymer, are shown in Figure S1 and S2. The additional proton signals arising from the azobenzene chromophores are overlapped with that of the PVK benzene hydrogen atoms, and are difficult to be distinguished from the above  $^1\text{H}$  NMR spectra. However, the successful grafting of the azobenzene-nitro or azobenzene-dicyano moieties onto the pendant carbazole chromophores can be confirmed by the changes of the lineshapes of the FTIR spectra of the polymers, as shown in Figure 2 in the main text.

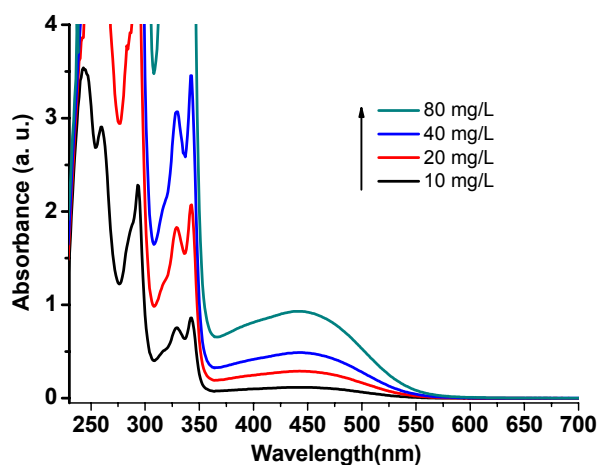

**Figure S3.** Concentration-dependent UV-visible absorption spectra of PVK-AZO- $\text{NO}_2$  in THF solutions.

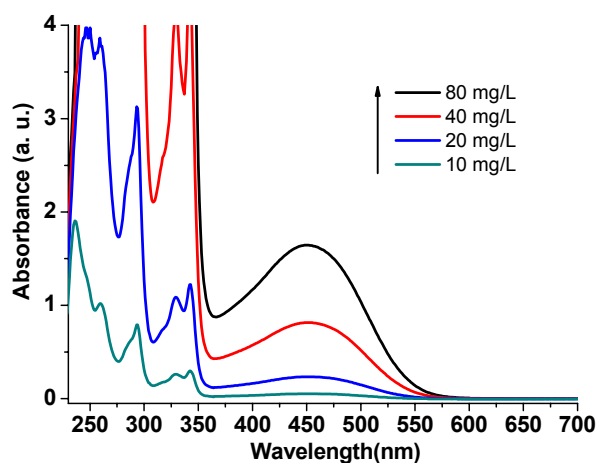

**Figure S4.** Concentration-dependent UV-visible absorption spectra of PVK-AZO-2CN in THF solutions.

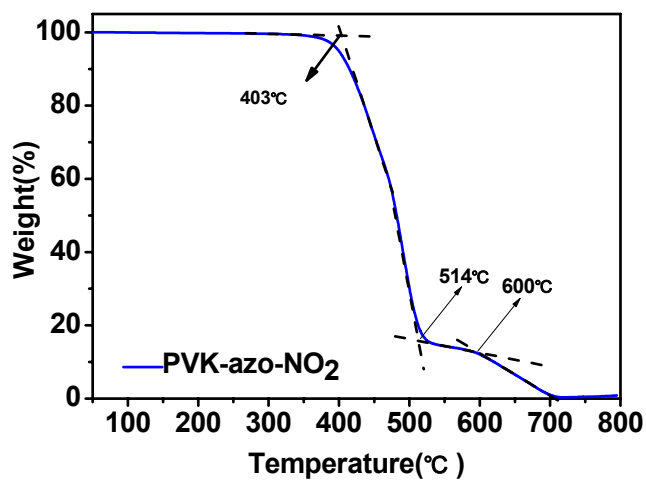

**Figure S5.** TGA thermogram of PVK-AZO-NO<sub>2</sub>.

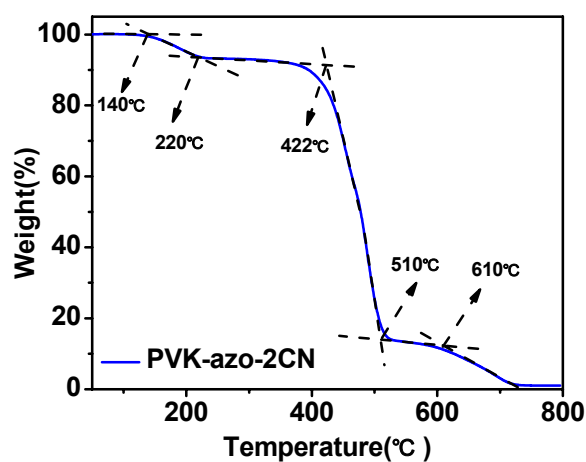

**Figure S6.** TGA thermogram of PVK-AZO-2CN.

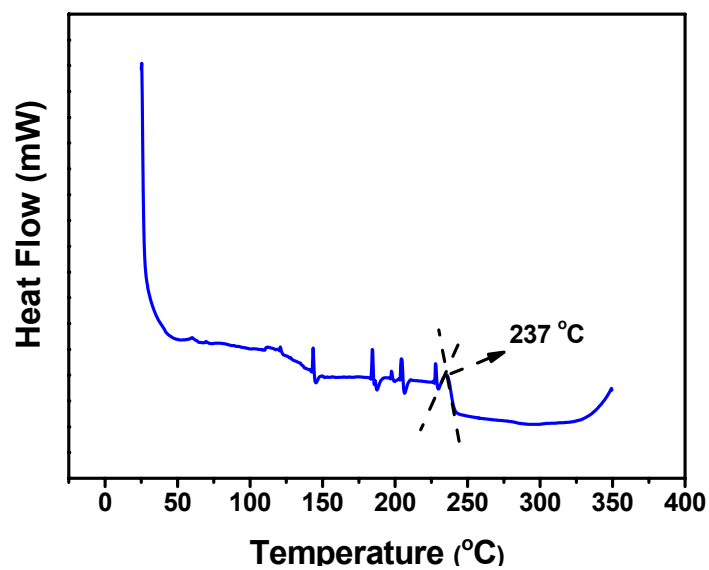

**Figure S7.** DSC thermogram of PVK-AZO-NO<sub>2</sub>.

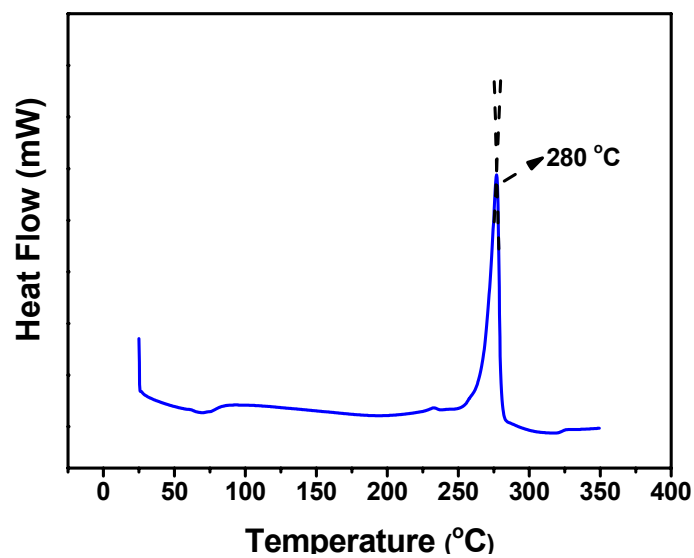

**Figure S8.** DSC thermogram of PVK-AZO-2CN.
